# Supplementary material for: Who gets to be an ELT course book author? Native speakerism in English for specific purposes and business English course books
Source: Frontiers journal article supplement (doi:10.3389/feduc.2024.1473353), 2024-10-09
Supplement: Table_1.docx [file Table_1.docx]

Appendix: List of all the sampled CBs by publisher

| Publisher | CB series | Year of publication | Number of CBA slots |
| --- | --- | --- | --- |
| OUP | Business Result 2nd edition | 2020 | 11 |
| International Express | 2019 | 6 |
| Express Series: English for Football | 2015 | 2 |
| Express Series: English for Logistics | 2015 | 1 |
| Oxford English for Careers: Engineering | 2013 | 2 |
| Skills for Business Studies | 2012 | 2 |
| Express Series: English for the Fashion Industry | 2012 | 1 |
| Successful Presentations | 2012 | 2 |
| Express Series: English for Cabin Crew | 2011 | 2 |
| Oxford English for Careers: Nursing | 2009 | 2 |
| Oxford English for careers: Medicine | 2009 | 1 |
| Business Venture | 2009 | 5 |
| Oxford English for Careers: Tourism | 2009 | 2 |
| Express Series: English for Aviation | 2008 | 2 |
| Express Series: English for Presentations | 2008 | 1 |
| Oxford English for Careers: Commerce | 2007 | 2 |
| Highly Recommended | 2005 | 2 |
| Tech Talk | 2005 | 2 |
| NGL | Success with Business | 2019 | 6 |
| English for Business: Professional English | 2008 | 1 |
| English for Business: Professional English | 2008 | 2 |
| English for Health Sciences: Professional English | 2007 | 5 |
| English for Science and Engineering: Professional English | 2007 | 1 |
| English for the Humanities: Professional English | 2007 | 2 |
| English for Professional Success: Professional English | 2006 | 6 |
| Macmillan | In Company 3.0 ESP Investment | 2017 | 1 |
| In Company 3.0 ESP Logistics | 2017 | 2 |
| In Company 3.0 ESP Supply Chain Management | 2017 | 2 |
| In Company 3.0 ESP Corporate Finance | 2016 | 1 |
| In Company 3.0 ESP Sales | 2016 | 1 |
| In Company 3.0 | 2014 | 5 |
| The Business 2.0 | 2013 | 5 |
| Email English | 2013 | 1 |
| Get Ready For International Business | 2013 | 2 |
| Meetings in English | 2011 | 1 |
| Aviation English | 2010 | 2 |
| Networking in English | 2010 | 2 |
| Get Ready for Business | 2010 | 2 |
| English for Law Enforcement | 2009 | 2 |
| Survival English | 1994 | 1 |
| Pearson | Business Partner | 2018 | 3 |
| CareerView | 2018 | 2 |
| Market Leader 3rd Edition Extra | 2016 | 5 |
| English for International Tourism | 2015 | 3 |
| Project Success | 2014 | 2 |
| Vocational English: English for Oil & Gas | 2013 | 2 |
| Vocational English: English for Construction | 2013 | 1 |
| Vocational English: English for Banking & Finance | 2013 | 2 |
| Vocational English: English for IT | 2012 | 2 |
| Intelligent Business | 2012 | 5 |
| Vocational English: English for Nursing | 2011 | 2 |
| Lifestyle | 2010 | 6 |
| Technical English | 2008 | 1 |
| CUP | The Cambridge Guide to OET Nursing | 2020 | 3 |
| Business Advantage | 2012 | 4 |
| New International Business English Student's Book | 2011 | 2 |
| Cambridge English for Human Resources | 2011 | 1 |
| Cambridge English for Scientists | 2011 | 1 |
| Flightpath | 2011 | 1 |
| Dynamic Presentations | 2011 | 1 |
| Cambridge English for Marketing | 2010 | 2 |
| English for Business Studies 3rd Edition | 2010 | 1 |
| Contact US! | 2009 | 2 |
| Safe Sailing | 2009 | 3 |
| Cambridge English for the Media | 2008 | 2 |
| Cambridge English for Engineering | 2008 | 1 |
| Cambridge English for Job-hunting | 2008 | 1 |
| Cambridge English for Nursing | 2008 | 2 |
| English for the Financial Sector | 2008 | 1 |
| Good Practice | 2008 | 2 |
| Business Start-up | 2006 | 2 |
| Company to Company 4th Edition | 2005 | 1 |
| Communicating in Business 2nd Edition | 2005 | 1 |
| English365 | 2004 | 3 |
| Welcome! English for the Travel and Tourism Industry 2nd Edition | 2005 | 1 |
| English in Medicine 3rd Edition | 2005 | 2 |
| Telephoning in English 3rd Edition | 2004 | 2 |
| English for Business Communication 2nd Edition | 2003 | 1 |
| Be My Guest. English for the Hotel Industry | 2002 | 1 |
| Essential Telephoning in English | 2002 | 2 |
| Total | 80 | - | 183 |
